# Supplementary material for: Uniformly dispersed platinum nanoparticles over nitrogen-doped reduced graphene oxide as an efficient electrocatalyst for the oxygen reduction reaction
Source: Royal Society of Chemistry journal article supplement (doi:10.1039/d1ra04857k), 2021-01-01
Supplement: d1ra04857k1.pdf [file d1ra04857k1.pdf]

## Supporting Information

### **Uniformly dispersed platinum nanoparticles over nitrogen-doped reduced graphene oxide as efficient electrocatalyst for oxygen reduction reaction**

Xiaohong Chen,<sup>a</sup> Zhiyong Xue,<sup>a\*</sup> Yafei Zheng,<sup>a</sup> Xundao Liu,<sup>c\*</sup> Yongming Zhang<sup>b\*</sup>

<sup>a</sup> Institute of Advanced Materials, North China Electric Power University, Beijing. E-mail:

xuezy@ncepu.edu.cn;

<sup>b</sup> School of Chemistry and Chemical Engineering, Shanghai Jiao Tong University, No. 800

Dongchuan Rd., Minhang District, Shanghai 200240, China. E-mail: ymzsztu@gmail.com

<sup>c</sup> School of Materials Science and Engineering, University of Jinan, Jinan, 250022 China. E-mail:

mse\_liuxundao@ujn.edu.cn

### **Contents**

**Fig. S1.** N<sub>2</sub> adsorption-desorption isotherms of rGO hybrids together with its pore size distributions (PSD) curve.

**Fig. S2.** N<sub>2</sub> adsorption-desorption isotherms of Pt-rGO hybrids together with its PSD curve.

**Fig. S3.** N<sub>2</sub> adsorption-desorption isotherms of Pt-N-rGO hybrids together with its PSD curve.

**Fig. S4.** (A, B) TEM images of Pt-rGO and Pt-N-rGO hybrids.

**Fig. S5.** LSVs of rGO hybrids at different rotation speed recorded in O<sub>2</sub>-saturated 1 M KOH solution at a scan rate of 10 mV s<sup>-1</sup>.

**Fig. S6.** The corresponding Koutecky-Levich plot of rGO derived from the RDE curves at 0.2-0.6 V with the electron transport number ( $n$ ).

**Fig. S7.** LSVs of Pt-rGO hybrids at different rotation speed recorded in O<sub>2</sub>-saturated 1 M KOH solution at a scan rate of 10 mV s<sup>-1</sup>.

**Fig. S8.** The corresponding Koutecky-Levich plot of Pt-rGO derived from the RDE curves at 0.2-0.6 V with the  $n$ .

**Fig. S9.** The corresponding Koutecky-Levich plot of Pt-N-rGO derived from the RDE curves at 0.2-0.6 V with the  $n$ .

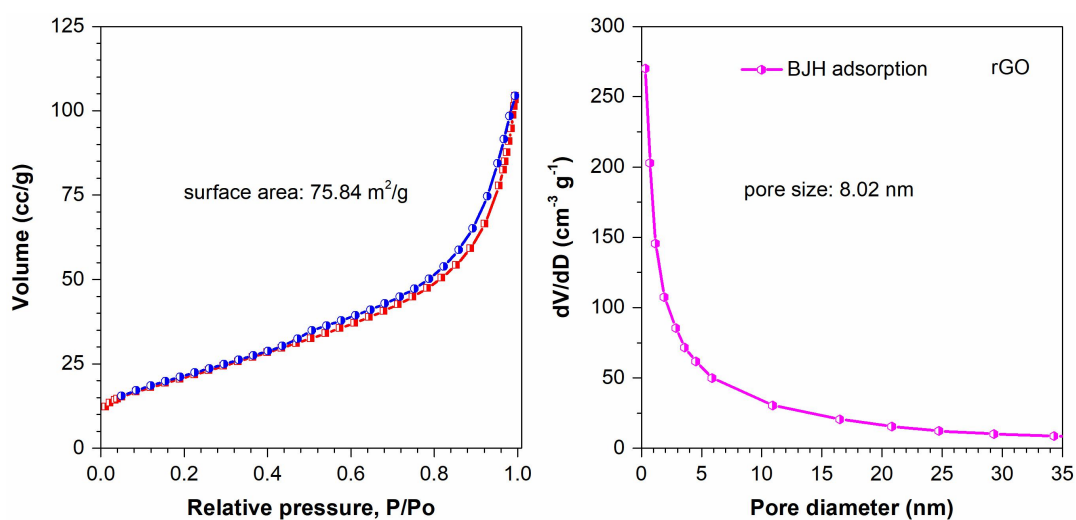

**Fig. S1.** N<sub>2</sub> adsorption-desorption isotherms of rGO hybrids together with its pore size distributions (PSD) curve.

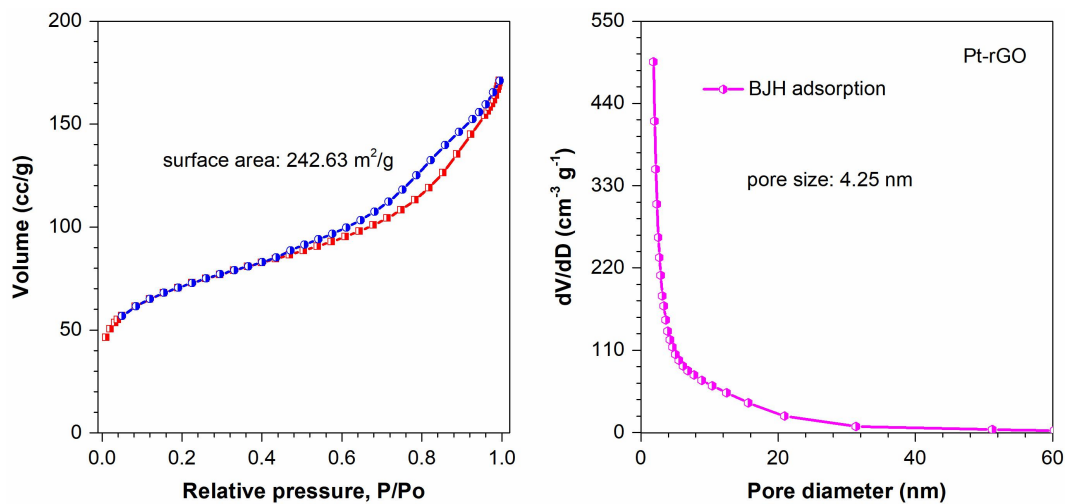

**Fig. S2.** N<sub>2</sub> adsorption-desorption isotherms of Pt-rGO hybrids together with its PSD curve.

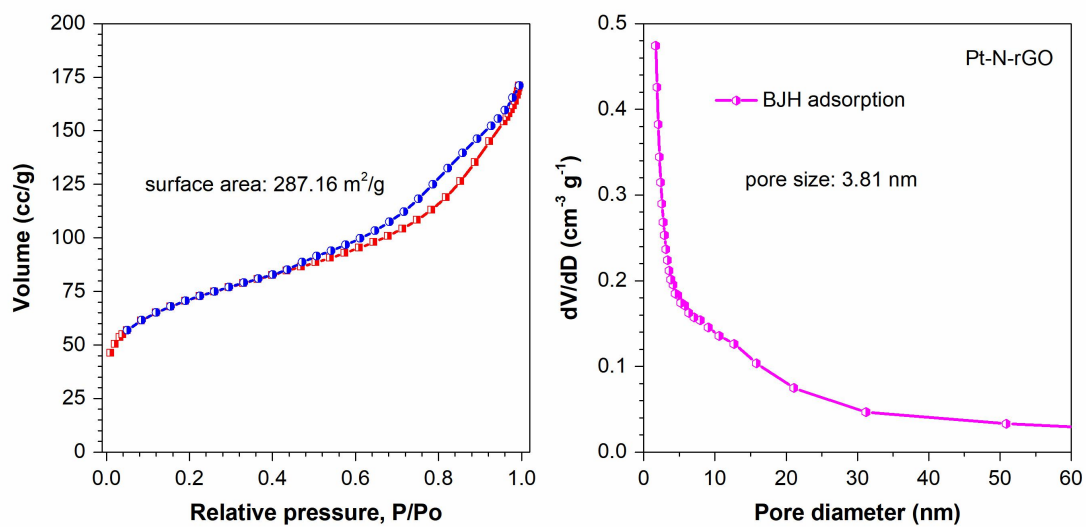

**Fig. S3.** N<sub>2</sub> adsorption-desorption isotherms of Pt-N-rGO hybrids together with its PSD curve.

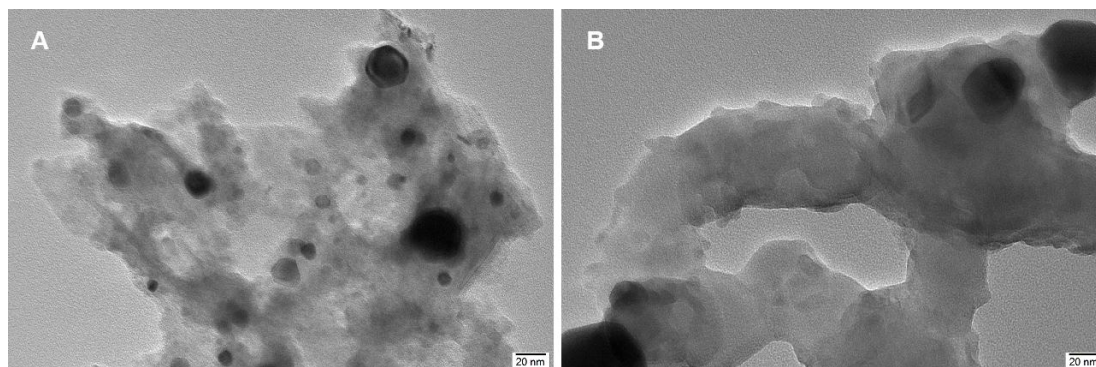

**Fig. S4.** (A, B) TEM images of Pt-rGO and Pt-N-rGO hybrids.

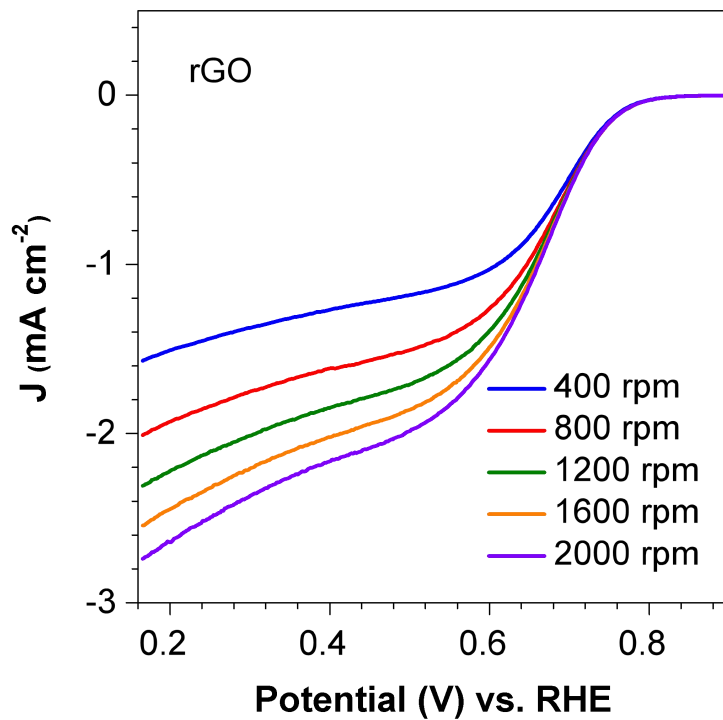

**Fig. S5.** LSVs of rGO hybrids at different rotation speed recorded in O<sub>2</sub>-saturated 1 M KOH solution at a scan rate of 10 mV s<sup>-1</sup>.

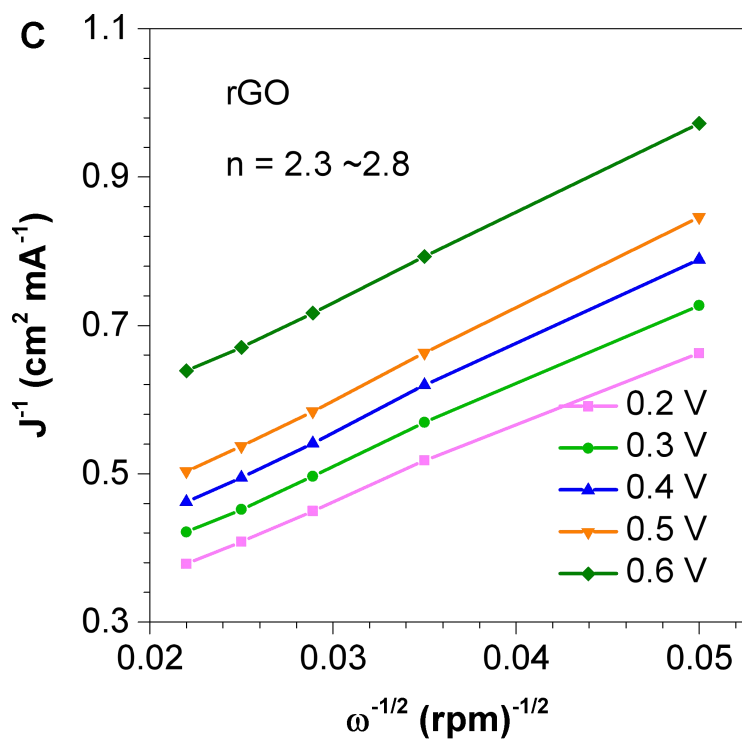

**Fig. S6.** The corresponding Koutecky-Levich plot of rGO derived from the RDE curves at 0.2-0.6 V with the electron transport number (n).

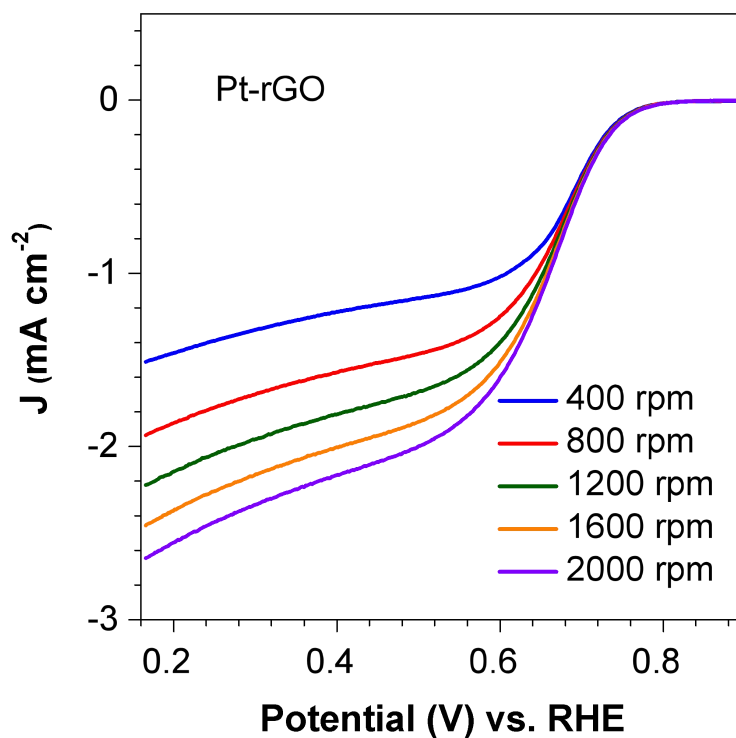

**Fig. S7.** LSVs of Pt-rGO hybrids at different rotation speed recorded in  $\text{O}_2$ -saturated 1 M KOH solution at a scan rate of  $10 \text{ mV s}^{-1}$ .

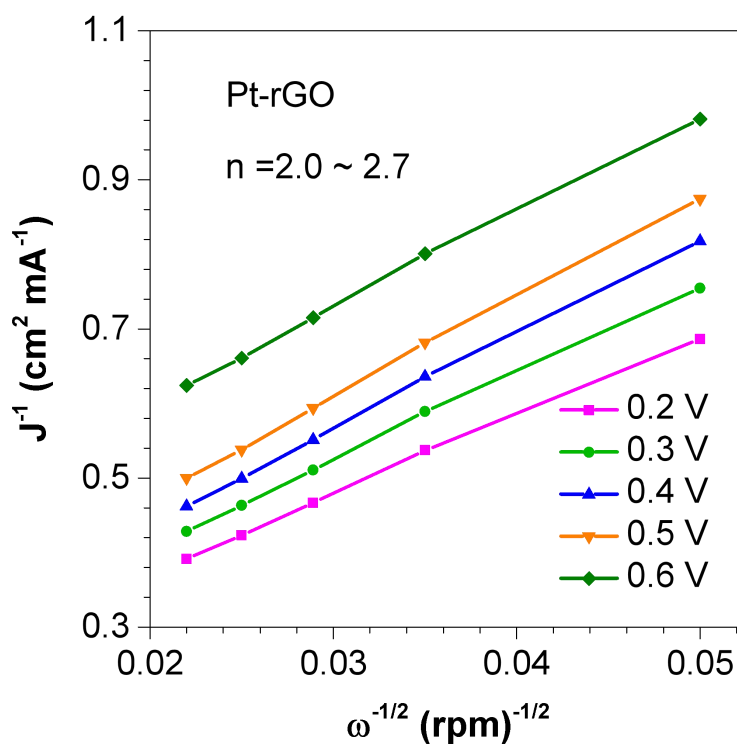

**Fig. S8.** The corresponding Koutecky-Levich plot of Pt-rGO derived from the RDE curves at 0.2-0.6 V with the  $n$ .

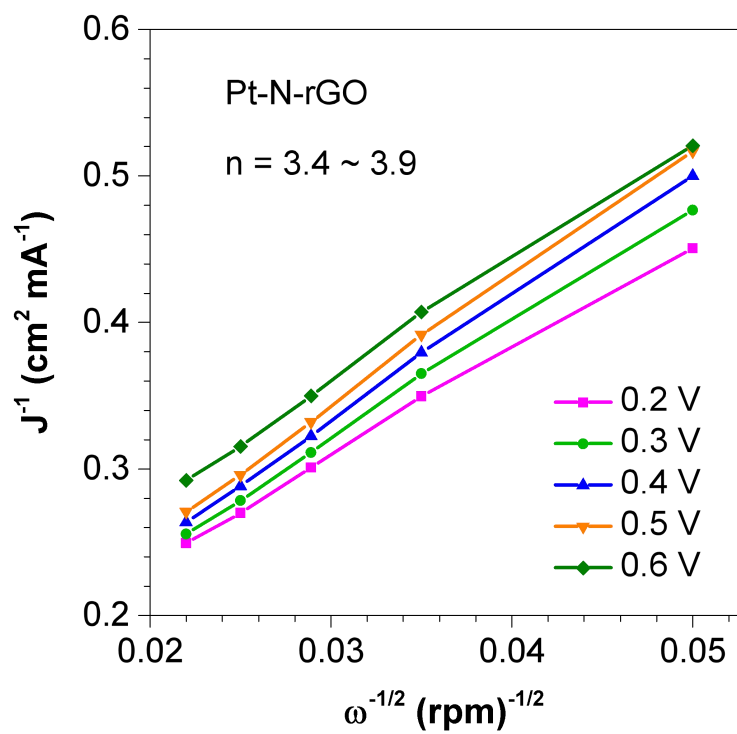

**Fig. S9.** The corresponding Koutecky-Levich plot of Pt-N-rGO derived from the RDE curves at 0.2-0.6 V with the n.
